# Supplementary material for: Characterization of the Glehnia littoralis Non-specific Phospholipase C Gene GlNPC3 and Its Involvement in the Salt Stress Response
Source: Front Plant Sci. 2021 Dec 9;12:769599. doi: 10.3389/fpls.2021.769599 (PMC8695444; doi:10.3389/fpls.2021.769599)
Supplement: Supplementary file 1 [file Table_1.XLSX]

## Sheet: Sheet1
Table S1. Primers used in this study.
Primer	Sequence (5' to 3')
GlNPC3-F1	ATGGCACCCGAAGCAACAAGC
GlNPC3-R1	CTAATTATCACAAATCAAGC
SP1	TCTGTTGCACCATGAGACGTAGCC
SP2	GGAAAACCACCTGTCACAAACCGC
SP3	TCAGCGAATCCTTCCATTGTCGGG
GlNPC3-F2	GCTCTAGAATGGCACCCGAAGCAACAAG
GlNPC3-R2	GCGTCGACATTA TCACAAATCA AGCAC
Pro-GlNPC3-F	TGGGAGCTCCTCGAGGGTACCTTCAGCGAATCCTTCCATT
Pro-GlNPC3-R	AGAGAATTCAAGCTTGGTACCTTTTTCTACCTTCTGGCTT
GlNPC3- F3	CGGGATCCATGGCACCCGAAGCAACAAG
GlNPC3- R3	CGGAATTCCTAATTA TCACAAATCA AGC
GlCYP2-F	GCCACTATCATTTGAGGAGACC
GlCYP2-R	CGTTGTGATTGGCTTGATCG
GlEXP1-F	AGCCCTCCTGCATGTTTAGT
GlEXP1-R	ACGAAGCTGGTCACTGTCAG
PDS-F	GCTCTAGAGTCGCTAAACTTTATCAAT
PDS-R	CGGGATCCCTTCAGTTTCCTGTCGAAC
vigs-F1	AAGGTTACCGAATTCTCTAGATGAACGGATTCAAACCAGAAATG
vigs-R1	CGTGAGCTCGGTACCGGATCCTCAAAGATGGTTTTCTGTGGATACC
vigs-F2	AAGGTTACCGAATTCTCTAGATTATCATCAATATCCTCCCAACACA
vigs-R2	CGTGAGCTCGGTACCGGATCCAAACATCATGAGCAGGGTGATCA
NPC3qrt-F	GGGGTGCACTTTTGGGATTT
NPC3qrt-R	CCGAAACATCATGAGCAGGG
11165-F	TTGCTGCTCATTTGATCTGG
11165-R	GATGCTTGGGCTGGTACATT
23203-F	AGTCGCGGGGATAGAAGAAT
23203-R	CTGTTTCCGGTGTGCCTAAT
MAPK-F	GTGGTTTCGATGTGGCCATT
MAPK-R	ACTTCGGCATGGCAAAACAT
CDPK-F	ATGGATGAGAGAAGGCGGAG
CDPK-R	TACCACTCTTGTCCGTGTCC
RAB-F	ACTATCGAGGAGCTGTTGGG
RAB-R	TCCAGAGCAGACGTTTCCAT
SOS1-F	CTGATCCTGTTGCTGTCGTG
SOS1-R	ATTTGACAACAGCAGCCCAG
CIPK-F	CACTGCCTTTCACAACACCA
CIPK-R	TTACTTGCCGGTCATTTGCC
TPC1-F	ACGCTTGCCAATTTCCCATT
TPC1-R	AGATCTTTGGCGGGTTGGTA
WRKY-F	TGGAGAGGTGCTTGGAAGAG
WRKY-R	GCCTTCCTCTTAACGCCTCT
P5CS-F	GTTGGCATCAGTACGAGCAG
P5CS-R	AAGCCTTCTGAGTGAGGTCC
SnRK2-F	GGCCCGGTTGATGAGAGATA
SnRK2-R	TTCGAACAGCTCTCCTCCAG
