# Supplementary material for: Characterization of the Glehnia littoralis Non-specific Phospholipase C Gene GlNPC3 and Its Involvement in the Salt Stress Response
Source: Front Plant Sci. 2021 Dec 9;12:769599. doi: 10.3389/fpls.2021.769599 (PMC8695444; doi:10.3389/fpls.2021.769599)
Supplement: Supplementary file 2 [file Table_2.XLSX]

## Sheet: Sheet1
Table S2. Accession number of proteins with sequence similarity to GlNPC3.
Species	Protein ID	Accession number	Locus
Arabidopsis thaliana	AtNPC1	AAW80856	At1g07230
	AtNPC2	AEC07902	At2g26870
	AtNPC3	Q9SRQ6	At3g03520
	AtNPC4	Q9SRQ7	At3g03530
	AtNPC5	Q9S816	At3g03540
	AtNPC6	AEE78437	At3g48610
Glycine max	GmNPC1a	XP_003539282	Gm11g24620
	GmNPC1b	XP_003551286	Gm18g07130
	GmNPC2	XP_003556783	Gm20g08030
	GmNPC4a	XP_003521010	Gm3g22860
	GmNPC4b	XP_003547754	Gm16g08990
	GmNPC6a	XP_003523153	Gm04g37360
	GmNPC6b	XP_003526950	Gm06g17730
Oryza sativa	OsNPC1	NP_001051765	Os03g61130
	OsNPC2	NP_001045435	Os01g72520
	OsNPC3	NP_001068198	Os03g63580
	OsNPC4	NP_001051927	Os11g38050
	OsNPC6	NP_001041746	Os01g01190
Physcomitrella patens	PpNPC1a	XP_001777798	Pp004G038300
	PpNPC1b	XP_001780602	Pp006G029500
	PpNPC1c	XP_001767460	Pp005G072700
	PpNPC1d	XP_001760978	Pp001G024100
	PpNPC1e	XP_001777578	Pp013G069600
Sorghum bicolor	SbNPC1	XP_002466168	Sb01g002750
	SbNPC2	XP_002459116.1	Sb03g046200
	SbNPC3	XP_002466082.1	Sb01g000860
	SbNPC4	XP_002451037.1	Sb05g023030
Selaginella moellendorffii	SmNPC1a	XP_002963410	Sm438555
	SmNPC1b	XP_002969128	Sm90880
Daucus carota	DcNPC1	XP_017236891.1	DCAR_005893
	DcNPC3	XP_017245126.1	DCAR_015756
